# Supplementary material for: Hierarchical graphene nanocones over 3D platform of carbon fabrics: A route towards fully foldable graphene based electron source
Source: Royal Society of Chemistry journal article supplement (doi:10.1039/c1nr10383k), 2011-01-01
Supplement: c1nr10383k.pdf [file c1nr10383k.pdf]

## **supplementary information:**

### **Hierarchical graphene nanocones over 3D platform of carbon fabrics: A route towards fully foldable graphene based electron source**

Uday N. Maiti, Soumen Maiti, Nirmalya S. Das and Kalyan K. Chattopadhyay

Thin Films and Nanoscience Laboratory, Department of Physics, Jadavpur University

Kolkata 700032( India)

#### **Preparation of graphene dispersion:**

Graphite oxide was prepared by chemical oxidation of natural graphite powder employing the method of Kovtyukhova et al.[ Nina I. Kovtyukhova, Patricia J. Ollivier, Benjamin R. Martin, Thomas E. Mallouk, Sergey A. Chizhik, Eugenia V. Buzaneva, Alexandr D. Gorchinskiy Chem. Mater. 1999, 11, 771- 778]. In brief, 1.5 g graphite powder (<50  $\mu\text{m}$ ) and 1.5 g sodium nitrate ( $\text{NaNO}_3$ , Merck) were mixed with 69 ml con. sulphuric acid ( $\text{H}_2\text{SO}_4$ , Merck) under stirring in flask that had been cooled to 0  $^\circ\text{C}$  using ice bath and allowed to stir for 15 min. Next, 9 g potassium permanganate ( $\text{KMnO}_4$ , Merck) was slowly added (for 50 min.) to this mixture under vigorous stirring keeping the temperature below 10  $^\circ\text{C}$ . Once mixed, the solution was transferred to a constant temperature water bath maintained at 35  $^\circ\text{C}$  and stirred gently for 2h which was followed by slow addition of 100 ml water during which the temperature of the reaction mixture increased to ~98  $^\circ\text{C}$ . This suspension was then diluted through quick addition of 200 ml of D.I water and in the subsequent time 10 ml of  $\text{H}_2\text{O}_2$  (30%) was added slowly thereby turning the color from deep brown to bright yellow. This suspension was then filtered and washed with 300 ml 1:10 HCl solution and finally with copious amount of D.I water until the PH of the filtrate become neutral. The filtered cake was then dried over  $\text{P}_2\text{O}_5$  under vacuum. 3 mg

GO was dispersed in 200 ml water and was sonicated at 200 W with a probe sonicator for 2h to obtain a stable GO dispersion of loading 0.015 mg/ml. The PH of this dispersion was adjusted between 10 and 11 by adding ammonia solution and then reduced with hydrazine hydrate (80%) (1:7 weight ratio with GO) at 90 °C in a regular laboratory oven for 6 hours to obtain a stable aqueous dispersion (0.015 mg/ml) of graphene. Graphene dispersion with 0.05 mg/ml loading was prepared exactly the same procedure as mentioned above taking 10 mg graphite oxide initially. The digital pictures of the stable dispersions are given below.

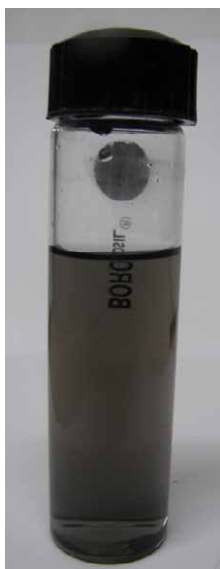

Graphene dispersion with loading  
0.015 mg/ml

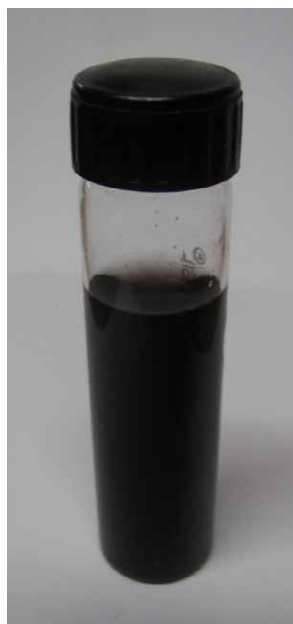

Graphene dispersion with 0.05  
mg/ml loading

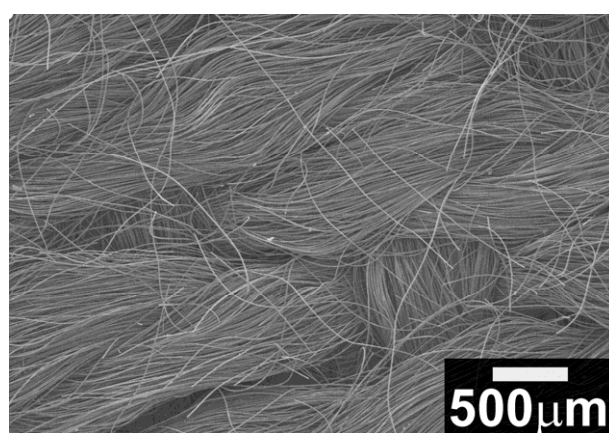

**Fig. S1:** Low magnification FESEM image of bare carbon fabric substrate

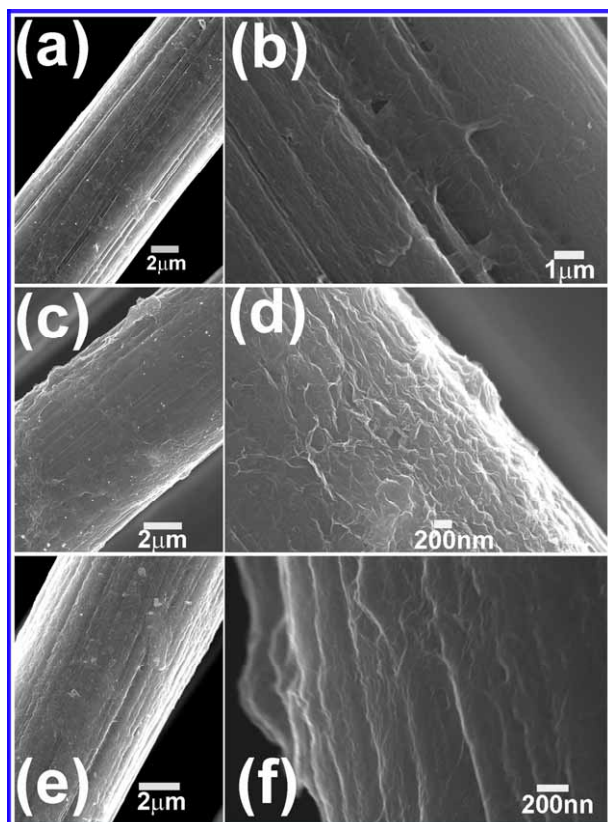

**Fig.S2:** FESEM image of deposited sample with deposition time : (a)&(b) 5s; (c)&(d) 1 min. ; (e) &(f) 5 min.

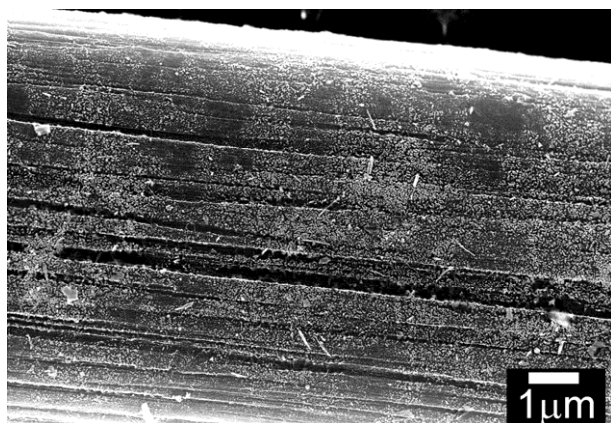

**Fig.S3:**FESEM image of a single carbon fiber after 5 min. plasma etching.

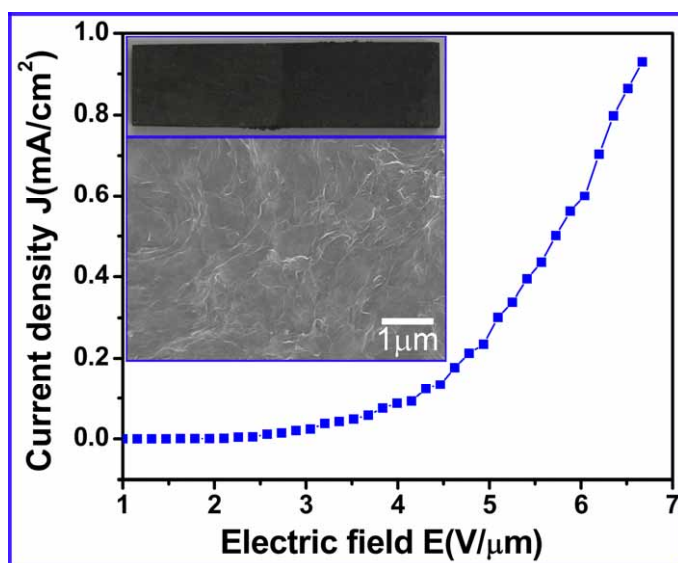

**Fig.S4: J-E plot for the EPD deposited graphene over flat graphite substrate. Insets display the digital image of the graphene deposited graphite substrate and its corresponding FESEM image.**
